# Supplementary material
Source: publisher figshare collection journal article supplement (https://gsajournals.figshare.com/articles/dataset/_/12661226)
Supplement: Supplementary file 1 [file 1]

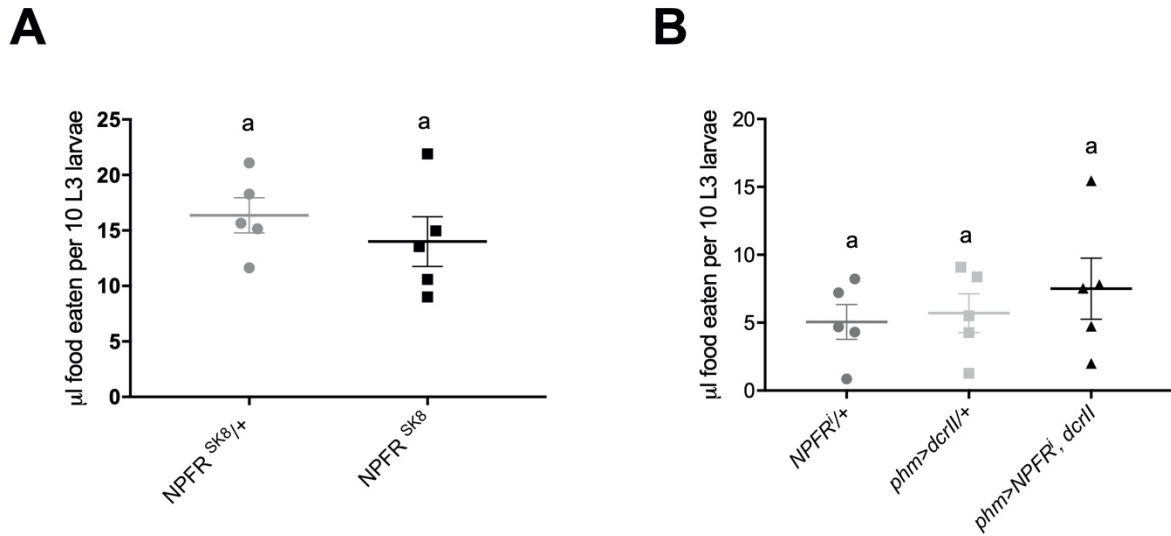

**Figure S2: Reduction of NPFR both specifically in the PG and animal wide does not affect amount of food consumed**

(A) *NPFR<sup>SK8</sup>* mutants do not consume significantly more or less food compared to controls ( $p = 0.588$ , pairwise *t*-test). (B) Similarly, animals where *NPFR* has been knocked down specifically in the PG do not consume significantly more or less food compared to controls ( $p = 0.414$ , ANOVA). Error bars represent  $\pm 1$  SEM for all graphs. Genotypes sharing the same letter indicate that they are not significantly different from one another. Each point represents the mean food consumed of a biological replicate of 10-15 newly ecdysed L3 larvae.
