# Supplementary material
Source: publisher figshare collection journal article supplement (https://gsajournals.figshare.com/articles/dataset/_/12661226)
Supplement: Supplementary file 2 [file 1]

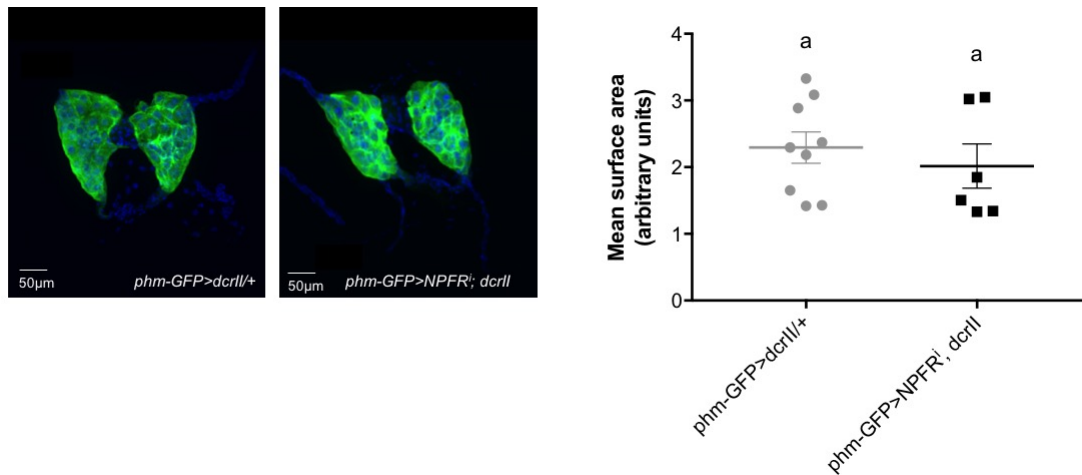

**Figure S1: Knocking down *NPFR* in the PG does not alter PG size**

Quantification of PG size from *phm>NPFR<sup>i</sup>; dcrII* and *phm>dcrII/+* animals shows that there are no significant differences in size. *phm-GFP; UAS-dcrII* was used to both knock down *NPFR* and to visualize PGs. Error bars represent  $\pm 1$  SEM. Scale bar = 50  $\mu$ m.

Genotypes indicated by the same letter indicate that they are not significantly different from one another ( $p = 0.528$ , pairwise  $t$  test).  $n = 9$  for *phm-GFP>dcrII* animals, and  $n = 6$  for *phm-GFP>NPFR<sup>i</sup>; dcrII*.
